# Supplementary material
Source: publisher figshare collection journal article supplement (https://sage.figshare.com/ndownloader/files/17428355)
Supplement: Supplementary file 1 [file 17428355]

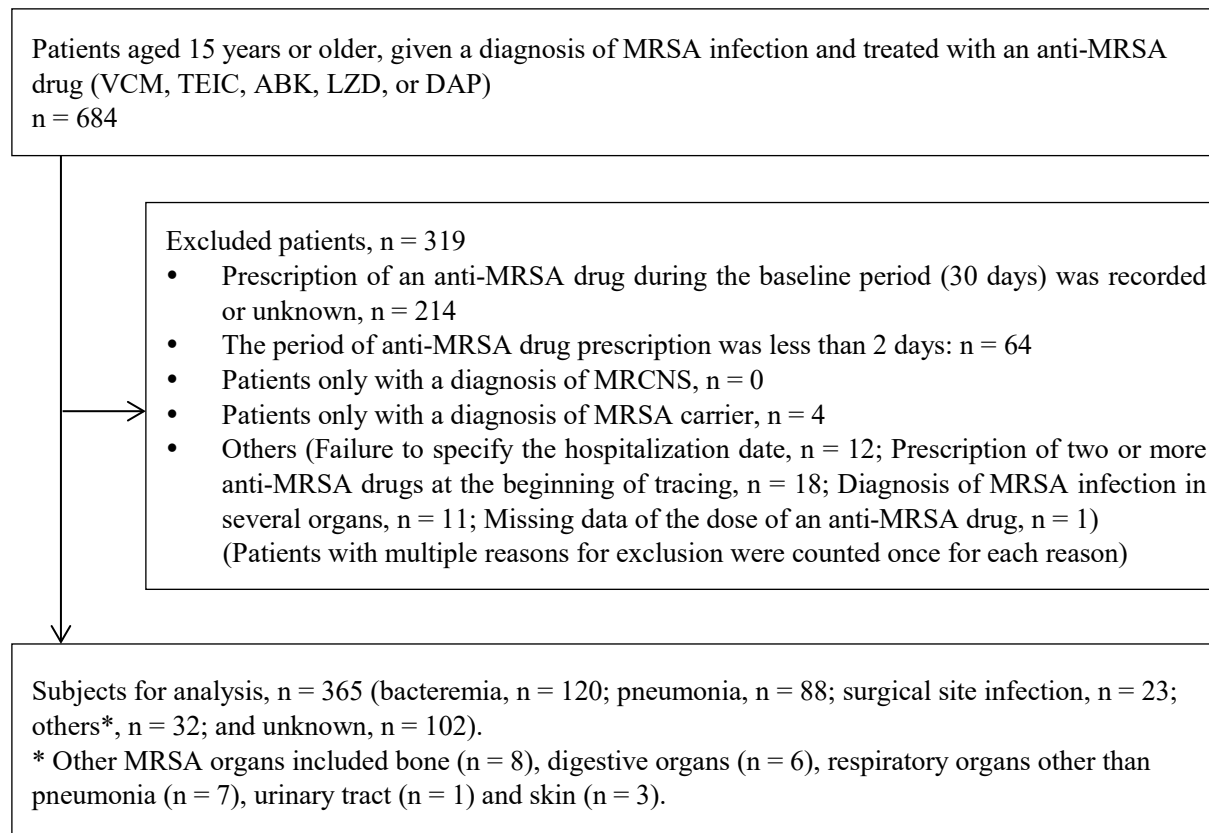

**Supplementary Figure 1.** Flow-chart of patient selection.

ABK: arbekacin; DAP: daptomycin; LZD: linezolid; MRCNS: methicillin-resistant coagulase-negative *Staphylococci*, MRSA: methicillin-resistant *Staphylococcus aureus*; SD: standard deviation; TEIC: teicoplanin; VCM: vancomycin.
